# Supplementary material for: An alternative technique for patterning cells on poly(ethylene glycol) diacrylate hydrogels
Source: Royal Society of Chemistry journal article supplement (doi:10.1039/c6ra08852j), 2016-01-01
Supplement: c6ra08852j1.pdf [file c6ra08852j1.pdf]

## Electronic Supplementary Information†

### Alternative technique for patterning cells on poly (ethylene glycol) diacrylate hydrogels

Mathew Peter<sup>a</sup> and Prakriti Tayalia<sup>a</sup>

<sup>a</sup>Department of Bioscience and Bioengineering  
Indian Institute of Technology, Bombay

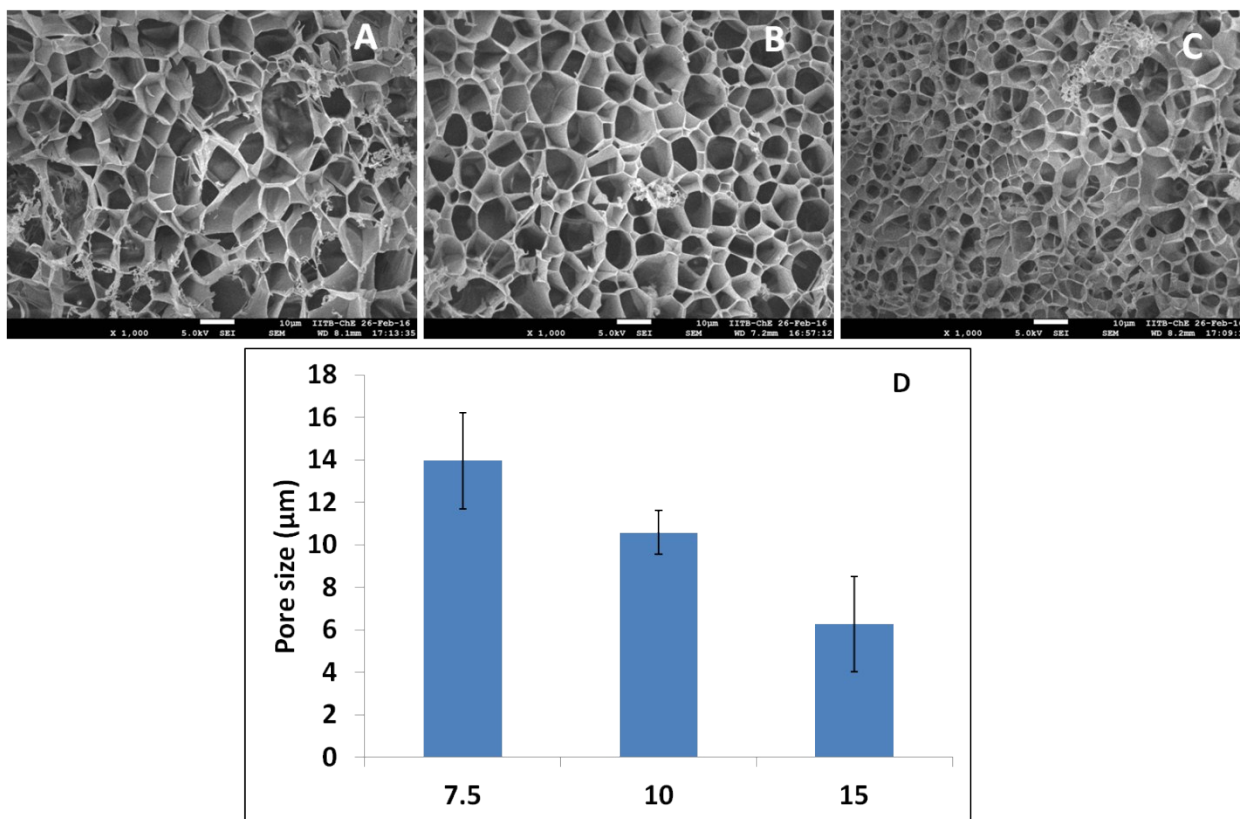

**Fig. S1** Cryo-SEM micrograph of PEGDA hydrogel. (A) 7.5 (B) 10 (C) 15 (w/v %) PEGDA hydrogel; scale bar 10  $\mu\text{m}$ , (D) Quantification of pore size from cryo-SEM micrographs using ImageJ.

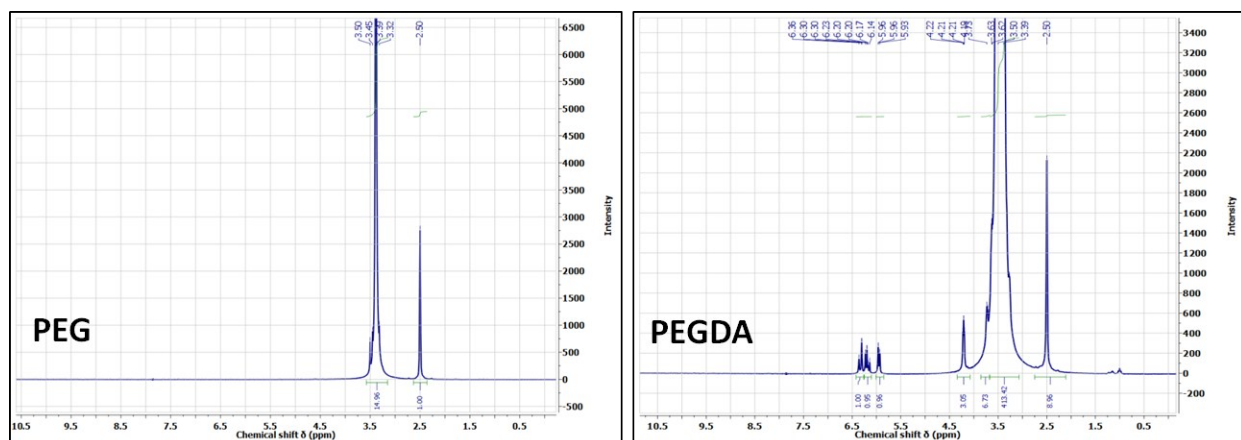

**Fig. S2**  $^1\text{H}$  NMR Spectrum of PEG-OH and PEGDA. Degree of acrylation, i.e. conversion of terminal OH group with vinyl group was determined by finding the ratio of area under the backbone PEG peak ( $\sim 4.2$  ppm) to that under the vinyl peak ( $\sim 5.9$ - $6.3$  ppm).

**Table. S1** Degree of acrylation of PEGDA calculated from NMR data using the equation mentioned below.

| Batch (PEG:ACRL molar ratio) | Degree of acrylation |
|------------------------------|----------------------|
| PEGDA-1 (0.46:1)             | 98.6247              |
| PEGDA-2 (0.36:1)             | 98.67524             |

Degree of acrylation or the degree of substitution of PEG was calculated as the ratio of vinylic peak intergral ( $\sim 5.9$ - $6.3$ ) to the backbone PEG peak integral.

$$\text{Degree of acrylation (PEGDA)} = \frac{(\text{Vinylic integral}/6)}{(\text{vinylic integral}/6) + (\text{Oxyethylene integral}/4) \times (44/\text{PEG molecular weight})} \times 100$$

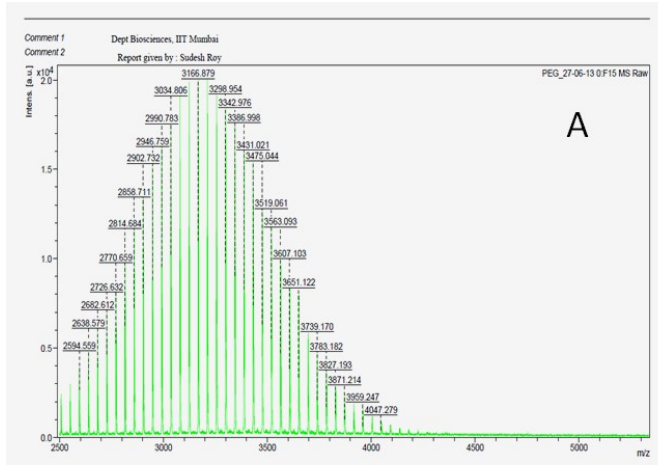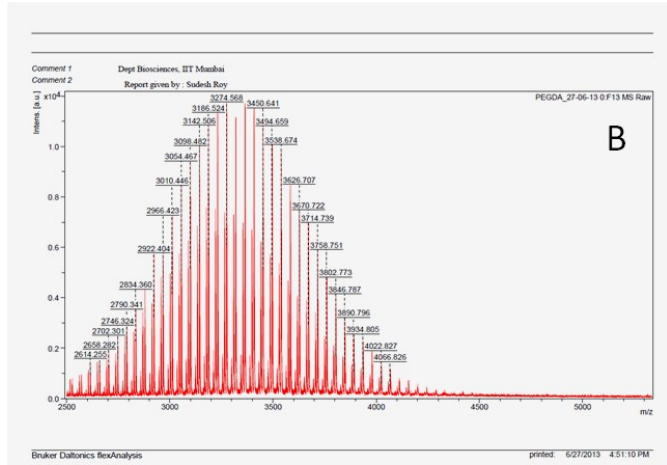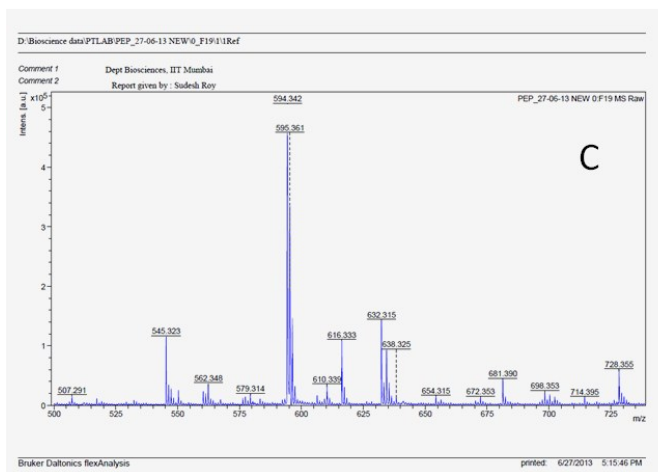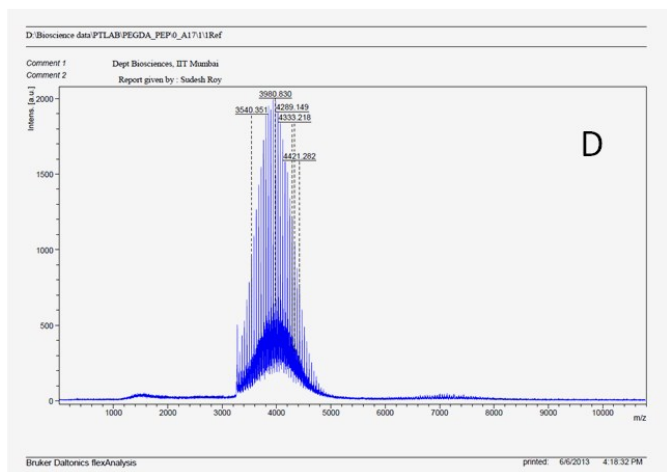

**Fig. S3** MALDI-TOF spectrum showing the mass peak of (A) PEG-OH, (B) PEGDA (C) CGRGDS peptide and (D) PEGDA-CGRGDS conjugate.

**Table S2.** Table showing number average molecular weight ( $M_n$ ), weight average molecular weight ( $M_w$ ) and polydispersity index (PDI) of PEG and PEGDA.

|              | $M_n$          | $M_w$          | PDI          |
|--------------|----------------|----------------|--------------|
| <b>PEG</b>   | <b>3407.45</b> | <b>3494.53</b> | <b>1.025</b> |
| <b>PEGDA</b> | <b>3495.45</b> | <b>3572.36</b> | <b>1.022</b> |

The number average molecular weight ( $M_n$ ), weight average molecular weight ( $M_w$ ) and polydispersity index (PDI) were calculated from MALDI data using the equations below:

$$M_n = \frac{\sum M_i N_i}{\sum N_i}$$

$$M_w = \frac{\sum M_i^2 N_i}{\sum M_i N_i}$$

$$PDI = \frac{M_w}{M_n}$$

$M_i$  = Molecular weight of  $i$  mass

$N_i$  = Signal intensity in the peak area of  $i$  mass

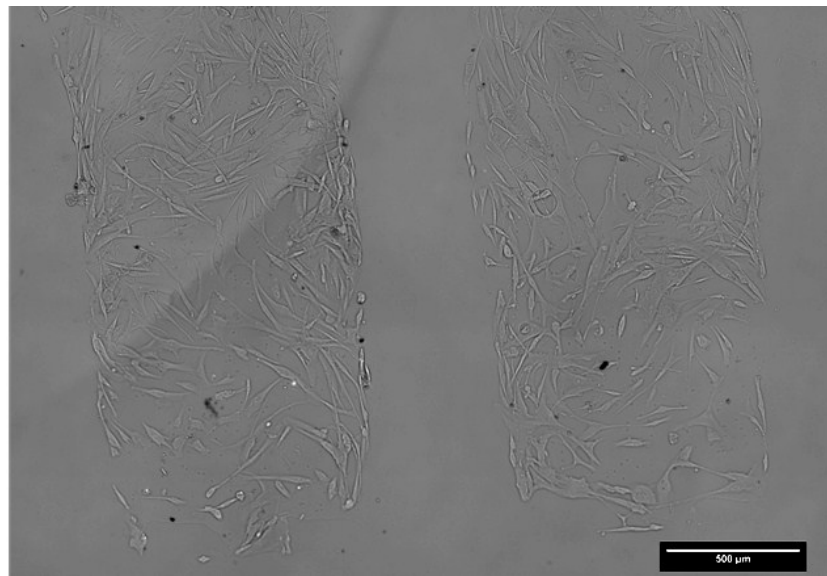

**Fig. S4** Optical micrograph showing adhesion of HDF cells via peptide patterned as lines on surface of inert PEGDA hydrogel (Scale bar 500  $\mu$ m).
